# Supplementary material for: Highly crystalline sodium manganese ferrocyanide microcubes for advanced sodium ion battery cathodes
Source: Royal Society of Chemistry journal article supplement (doi:10.1039/c9ta08603j), 2019-01-01
Supplement: c9ta08603j1.pdf [file c9ta08603j1.pdf]

## Supporting Information

### Highly crystalline sodium manganese ferrocyanide microcubes for advanced sodium ion battery cathodes

Fangwei Peng,<sup>a</sup> Lei Yu,<sup>b</sup> Pengyue Gao,<sup>c,d</sup> Xiao-Zhen Liao,<sup>\*a</sup> Jianguo Wen,<sup>b</sup> Yushi He,<sup>a</sup> Guoqiang Tan,<sup>c</sup> Yang Ren,<sup>c</sup> and Zi-Feng Ma<sup>a</sup>

- Shanghai Electrochemical Energy Devices Research Center, Department of Chemistry and Chemical Engineering, Shanghai Jiao Tong University, Shanghai 200240, China.  
E-mail: liaoxz@sjtu.edu.cn;
- Center for Nanoscale Materials, Argonne National Laboratory, Argonne, IL 60439, USA.
- X-ray Science Division, Argonne National Laboratory, IL 60439, USA.
- State Key Laboratory of Advanced Special Steel & Shanghai Key Laboratory of Advanced Ferrometallurgy & School of Materials Science and Engineering, Shanghai University, Shanghai 200072, China.
- School of Materials Science & Engineering, Beijing Institute of Technology, Beijing 100081, China.

**Table S1 ICP results of the as-prepared PBM samples (Fe/Mn/Na molar ratio)**

| Samples | Fe   | Mn | Na   | Chemical formula                                                         |
|---------|------|----|------|--------------------------------------------------------------------------|
| H-PBM   | 0.98 | 1  | 1.95 | $\text{Na}_{1.92}\text{Mn}[\text{Fe}(\text{CN})_6]_{0.98}\square_{0.02}$ |
| L-PBM   | 0.90 | 1  | 1.62 | $\text{Na}_{1.60}\text{Mn}[\text{Fe}(\text{CN})_6]_{0.9}\square_{0.10}$  |

In this work, the synthesis process of  $\text{Na}_2\text{MnFe}(\text{CN})_6$  microcubes (H-PBM) was in room temperature. In this condition the  $[\text{Fe}(\text{CN})_6]^{4-}$  could not decompose to generate  $\text{Fe}^{2+}$  and  $\text{CN}^-$ , thus the number of  $(\text{CN})_6$  was directly related to Fe content. Actually self-decomposition of  $[\text{Fe}(\text{CN})_6]^{4-}$  only occurs in hot acidic solution. In the preparation of L-PBM no acidic reagent was used, thus the chemical composition of obtained  $\text{Na}_x\text{Mn}[\text{Fe}(\text{CN})_6]_y$  both for H-PBM and L-PBM can be calculated from ICP results of Na/Mn/Fe. As shown in Table S1 the ICP results of Fe/Mn/Na were 0.98/1/1.95 for H-PBM and 0.90/1/1.62 for L-PBM respectively in this work. Considering the charge balance we described the chemical formula of H-PBM as  $\text{Na}_{1.92}\text{Mn}[\text{Fe}(\text{CN})_6]_{0.98}\square_{0.02}$  ( $\square$  represents a  $[\text{Fe}(\text{CN})_6]^{4-}$  vacancy), and chemical formula of L-PBM as  $\text{Na}_{1.60}\text{Mn}[\text{Fe}(\text{CN})_6]_{0.9}\square_{0.10}$ .

**Table S2. The comparison of representative Prussian blue analogue materials for sodium-ion batteries.**

| Composition<br>Synthesis method                                                                                               | Size<br>( $\mu\text{m}$ ) | Reversible<br>capacity in<br>Na cells<br>( $\text{mAh g}^{-1}$ /<br>$\text{mA g}^{-1}$ ) | Average<br>working<br>voltage<br>(V vs.<br>$\text{Na}^+/\text{Na}$ ) | Rate<br>Performance<br>( $\text{mAh g}^{-1}$ ) | Cycle life                                            |
|-------------------------------------------------------------------------------------------------------------------------------|---------------------------|------------------------------------------------------------------------------------------|----------------------------------------------------------------------|------------------------------------------------|-------------------------------------------------------|
| $\text{Na}_{0.84}\text{Ni}[\text{Fe}(\text{CN})_6]_{0.71} \cdot 6\text{H}_2\text{O}^1$<br>Simple co-precipitation             | ~0.05                     | 66 / 20                                                                                  | 3.1                                                                  | N.A.                                           | 99.7% $@200^{\text{th}}$<br>at 20 $\text{mA g}^{-1}$  |
| $\text{Na}_2\text{Zn}_3[\text{Fe}(\text{CN})_6]_2 \cdot x\text{H}_2\text{O}^2$<br>Simple co-precipitation                     | ~0.5                      | 56.4 / 10                                                                                | 3.3                                                                  | N.A.                                           | 85.2% $@50^{\text{th}}$<br>at 10 $\text{mA g}^{-1}$   |
| $\text{Na}_{0.7}\text{Ti}[\text{Fe}(\text{CN})_6]_{0.9}^3$<br>Simple co-precipitation                                         | 0.1-<br>0.15              | 92.3 / 50                                                                                | 3.4/3.0                                                              | 38 $\text{mAh g}^{-1}$<br>/ 4C                 | 70% $@50^{\text{th}}$ at<br>50 $\text{mA g}^{-1}$     |
| $\text{Cu}_3[\text{Fe}(\text{CN})_6]_2^4$<br>Simple co-precipitation                                                          | 0.03-<br>0.08             | 44 / 20                                                                                  | 3.3                                                                  | 25 $\text{mAh g}^{-1}$<br>/ 1C                 | 57.1% $@50^{\text{th}}$<br>at 20 $\text{mA g}^{-1}$   |
| $\text{FeFe}(\text{CN})_6^5$<br>Simple co-precipitation                                                                       | ~0.4                      | 120 / 60                                                                                 | 3.4/2.8                                                              | 78 $\text{mAh g}^{-1}$<br>/ 20C                | 87% $@500^{\text{th}}$<br>at 2 C                      |
| $\text{Na}_{0.61}\text{Fe}[\text{Fe}(\text{CN})_6]_{0.94} \cdot 2.79\text{H}_2\text{O}^6$<br>Acid-assisted single iron-source | 0.3-<br>0.6               | 170 / 25                                                                                 | 3.4/2.7                                                              | 70 $\text{mAh g}^{-1}$<br>/ 4C                 | 100% $@150^{\text{th}}$<br>at 0.2 C                   |
| $\text{Na}_{1.56}\text{FeFe}(\text{CN})_6 \cdot 3.1\text{H}_2\text{O}^7$<br>Acid-assisted single iron-source                  | 0.5-3                     | 103.6 / 20                                                                               | 3.4/2.9                                                              | 90 $\text{mAh g}^{-1}$<br>/ 1C                 | 97% $@400^{\text{th}}$<br>at 20 $\text{mA g}^{-1}$    |
| $\text{Na}_{1.63}\text{Fe}[\text{Fe}(\text{CN})_6]_{0.89}^8$<br>Acid-assisted single iron-source                              | 1-3                       | 150 / 25                                                                                 | 3.5/2.6                                                              | N.A.                                           | 90% $@200^{\text{th}}$<br>at 25 $\text{mA g}^{-1}$    |
| $\text{Na}_{1.70}\text{FeFe}(\text{CN})_6^9$<br>Citrate as chelating agent                                                    | ~0.05                     | 129 / 200                                                                                | 3.45/2.7                                                             | 71.2 $\text{mAh g}^{-1}$<br>/ 12C              | 70.5% $@100^{\text{th}}$<br>at 200 $\text{mA g}^{-1}$ |
| $\text{Na}_{1.73}\text{Fe}[\text{Fe}(\text{CN})_6]_{0.98}^{10}$<br>Simple co-precipitation                                    | 0.06-<br>0.1              | 123 / 100                                                                                | 3.25/<br>2.85                                                        | 78 $\text{mAh g}^{-1}$<br>/ 8C                 | 73% $@200^{\text{th}}$<br>at 1 C                      |
| Dehydrated $\text{Na}_{1.92}\text{FeFe}(\text{CN})_6^{11}$<br>Acid-assisted single iron-source                                | 0.8-4                     | 160 / 10                                                                                 | 3.29/3.0                                                             | 145 $\text{mAh g}^{-1}$<br>/ 10C               | 80% $@750^{\text{th}}$<br>at 2 C                      |
| $\text{Na}_{1.95}\text{Fe}[\text{Fe}(\text{CN})_6]_{0.93} \cdot 0.07^{12}$<br>Citrate as chelating agent                      | 3-4                       | ~120 / 50                                                                                | 3.02/<br>2.87                                                        | 60 $\text{mAh g}^{-1}$<br>/ 16C                | 79% $@280^{\text{th}}$<br>at 100 $\text{mA g}^{-1}$   |
| $\text{Na}_{1.60}\text{Co}[\text{Fe}(\text{CN})_6]_{0.90} \cdot 2.9\text{H}_2\text{O}^{13}$<br>Electrochemical deposition     | N.A.                      | 139 / 70                                                                                 | 3.8/3.4                                                              | 121 $\text{mAh g}^{-1}$<br>/ 60C               | 71% $@100^{\text{th}}$<br>at 0.6 C                    |
| $\text{Na}_{1.85}\text{Co}[\text{Fe}(\text{CN})_6]_{0.99} \cdot 1.9\text{H}_2\text{O}^{14}$<br>Citrate as chelating agent     | ~0.6                      | 153 / 10                                                                                 | 3.8/3.2                                                              | 60 $\text{mAh g}^{-1}$<br>/ 5C                 | 90% $@200^{\text{th}}$<br>at 200 $\text{mA g}^{-1}$   |
| $\text{Na}_{1.32}\text{Mn}[\text{Fe}(\text{CN})_6]_{0.83} \cdot 3.5\text{H}_2\text{O}^{15}$<br>Electrochemical deposition     | ~1                        | 109 / 50                                                                                 | 3.6/3.2                                                              | 80 $\text{mAh g}^{-1}$<br>/ 20C                | 90% $@100^{\text{th}}$<br>at 0.5 C                    |
| $\text{Na}_{1.72}\text{Mn}[\text{Fe}(\text{CN})_6]_{0.99} \cdot 2.0\text{H}_2\text{O}^{16}$<br>Simple co-precipitation        | N.A.                      | 134 / 6                                                                                  | 3.57/<br>3.27                                                        | 46 $\text{mAh g}^{-1}$<br>/ 40C                | 90% $@30^{\text{th}}$ at<br>6 $\text{mA g}^{-1}$      |
| R- $\text{Na}_{1.89}\text{Mn}[\text{Fe}(\text{CN})_6]_{0.97}^{17}$<br>Simple co-precipitation (in 25%<br>ethanol solution)    | 0.08-<br>0.35             | 150 / 15                                                                                 | 3.44                                                                 | 121 $\text{mAh g}^{-1}$<br>/ 20C               | 75% $@500^{\text{th}}$<br>at 100 $\text{mA g}^{-1}$   |
| $\text{Na}_{1.96}\text{Mn}[\text{Mn}(\text{CN})_6]_{0.99} \cdot 2\text{H}_2\text{O}^{18}$                                     | ~0.1                      | 209 / 40                                                                                 | 3.6/2.8                                                              | 156 $\text{mAh g}^{-1}$                        | 75% $@100^{\text{th}}$                                |

|                                                                                                                                                                                    |             |            |               |                                   |                                                               |
|------------------------------------------------------------------------------------------------------------------------------------------------------------------------------------|-------------|------------|---------------|-----------------------------------|---------------------------------------------------------------|
| Simple co-precipitation                                                                                                                                                            |             |            |               | / 5C                              | at 2 C                                                        |
| Na <sub>1.7</sub> MnFe(CN) <sub>6</sub> ·2.38H <sub>2</sub> O <sup>19</sup><br>Citrate as chelating agent                                                                          | 0.2-<br>0.5 | 136.8 / 12 | 3.45/<br>3.25 | ~10 mAh g <sup>-1</sup><br>/ 40C  | ~45% <sup>@200<sup>th</sup></sup><br>at 2 C                   |
| Na <sub>1.92</sub> Mn[Fe(CN) <sub>6</sub> ] <sub>0.98</sub> ·1.38H <sub>2</sub> O<br>dissociation/precipitation<br>method using EDTA-MnNa <sub>2</sub><br>precursor (in this work) | 3-5         | 152.8 / 10 | 3.45          | 110.3mAh g <sup>-1</sup><br>/ 10C | 82% <sup>@500<sup>th</sup></sup><br>at 100 mA g <sup>-1</sup> |

## References:

- 1 Y. You, X. Wu, Y. Yin and Y. Guo, *J MATER CHEM A*, 2013, **1**, 14061.
- 2 H. Lee, Y. Kim, J. Park and J. W. Choi, *CHEM COMMUN*, 2012, **48**, 8416.
- 3 M. Xie, Y. Huang, M. Xu, R. Chen, X. Zhang, L. Li and F. Wu, *J POWER SOURCES*, 2016, **302**, 7-12.
- 4 S. Jiao, J. Tuo, H. Xie, Z. Cai, S. Wang and J. Zhu, *MATER RES BULL*, 2017, **86**, 194-200.
- 5 X. Wu, W. Deng, J. Qian, Y. Cao, X. Ai and H. Yang, *J MATER CHEM A*, 2013, **1**, 10130.
- 6 Y. You, X. Wu, Y. Yin and Y. Guo, *Energy Environ. Sci.*, 2014, **7**, 1643-1647.
- 7 W. Li, S. Chou, J. Wang, Y. Kang, J. Wang, Y. Liu, Q. Gu, H. Liu and S. Dou, *CHEM MATER*, 2015, **27**, 1997-2003.
- 8 Y. You, X. Yu, Y. Yin, K. Nam and Y. Guo, *NANO RES*, 2015, **8**, 117-128.
- 9 Y. Liu, Y. Qiao, W. Zhang, Z. Li, X. Ji, L. Miao, L. Yuan, X. Hu and Y. Huang, *NANO ENERGY*, 2015, **12**, 386-393.
- 10 Y. Yang, E. Liu, X. Yan, C. Ma, W. Wen, X. Liao and Z. Ma, *J ELECTROCHEM SOC*, 2016, **163**, A2117-A2123.
- 11 L. Wang, J. Song, R. Qiao, L. A. Wray, M. A. Hossain, Y. Chuang, W. Yang, Y. Lu, D. Evans, J. Lee, S. Vail, X. Zhao, M. Nishijima, S. Kakimoto and J. B. Goodenough, *J AM CHEM SOC*, 2015, **137**, 2548-2554.
- 12 Y. Huang, M. Xie, J. Zhang, Z. Wang, Y. Jiang, G. Xiao, S. Li, L. Li, F. Wu and R. Chen, *NANO ENERGY*, 2017, **39**, 273-283.
- 13 M. Takachi, T. Matsuda and Y. Moritomo, *APPL PHYS EXPRESS*, 2013, **6**.
- 14 X. Wu, C. Wu, C. Wei, L. Hu, J. Qian, Y. Cao, X. Ai, J. Wang and H. Yang, *ACS APPL MATER INTER*, 2016, **8**, 5393-5399.
- 15 T. Matsuda, M. Takachi and Y. Moritomo, *Chemical communications (Cambridge, England)*, 2013, **49**, 275-2752.
- 16 L. Wang, Y. Lu, J. Liu, M. Xu, J. Cheng, D. Zhang and J. B. Goodenough, *Angewandte Chemie International Edition*, 2013, **52**, 1964-1967.
- 17 J. Song, L. Wang, Y. Lu, J. Liu, B. Guo, P. Xiao, J. Lee, X. Yang, G. Henkelman and J. B. Goodenough, *J AM CHEM SOC*, 2015, **137**, 2658-2664.
- 18 H. Lee, R. Y. Wang, M. Pasta, S. Woo Lee, N. Liu and Y. Cui, *NAT COMMUN*, 2014, **5**.
- 19 W. Li, S. Chou, J. Wang, J. Wang, Q. Gu, H. Liu and S. Dou, *NANO ENERGY*, 2015, **13**, 200-207.

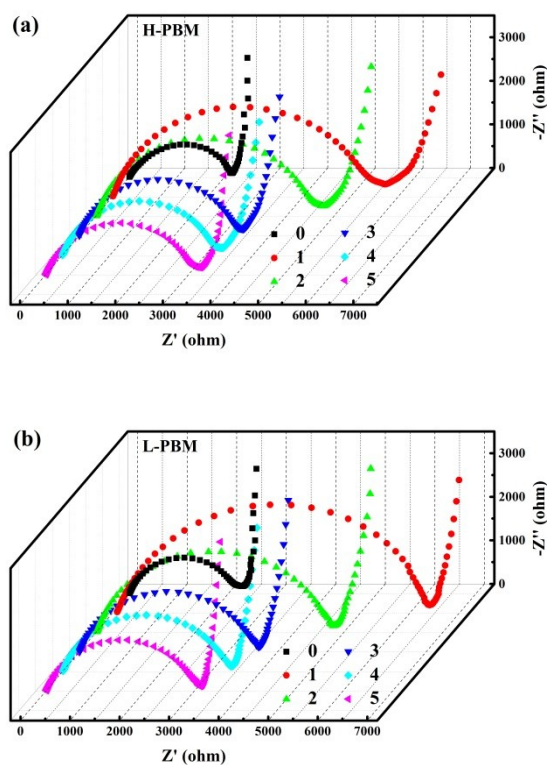

**Fig. S1** EIS plots of (a) H-PBM and (b) L-PBM cells before cycle and after 1<sup>st</sup>, 2<sup>nd</sup>, 3<sup>rd</sup>, 4<sup>th</sup> and 5<sup>th</sup> cycle at 0.1C rate, respectively.

The EIS plots of H-PBM and L-PBM cells were recorded before cycle and after 1st, 2nd, 3rd, 4<sup>th</sup> and 5th cycle at 0.1C rate, respectively. It is clear that all the EIS plots consist one depressed semicircle in the high frequency region and an inclined line in the low frequency region. The depressed semicircle at higher frequency region represents the impedance of charge transfer process. The slop at low frequency region reflects a semi-infinite Warburg diffusion process. It can be seen that after the first cycle, the charge transfer resistance obviously increased owing to the formation of SEI on the electrode surface. Then the resistance decreased in the subsequent cycles as the SEI film turn to be stable. It is noted that even though the larger surface area of L-PBM may benefit the interface charge transfer reaction the observed electrochemical impedance of the L-PBM electrode was still similar or slightly larger than that of the H-PBM electrode for each tested cycle. This result indicates that the enhanced Na<sup>+</sup> transfer kinetic of H-PBM ensured its good electrochemical performance in spite of its large particle size.

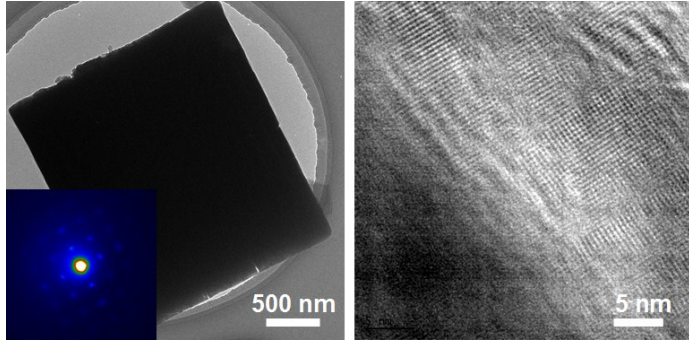

**Fig. S2 TEM, HRTEM images and selected area electron diffraction (SAED) pattern of a H-PBM particle after 500 cycles.**
